# Supplementary material
Source: publisher figshare collection journal article supplement (https://acs.figshare.com/ndownloader/files/26322205)
Supplement: Supplementary file 1 [file 26322205]

# Supporting Information

## **Efficient Thermal Processes using Alternating Electromagnetic Field for Methodical and Selective Release of Hydrogen Isotopes**

*Simona E. Hunyadi Murph,<sup>\*,†,§</sup> Henry Sessions Jr.,<sup>†</sup>*

*Kaitlin Coopersmith,<sup>†</sup> Michael Brown,<sup>†</sup> and Patrick Ward<sup>†</sup>*

<sup>†</sup>Savannah River National Laboratory, Aiken, SC USA

<sup>§</sup>Department of Physics and Astronomy, University of Georgia, Athens, GA USA

\*Corresponding author, email address: [Simona.Murph@srnl.doe.gov](mailto:Simona.Murph@srnl.doe.gov), phone: 803-646-6761

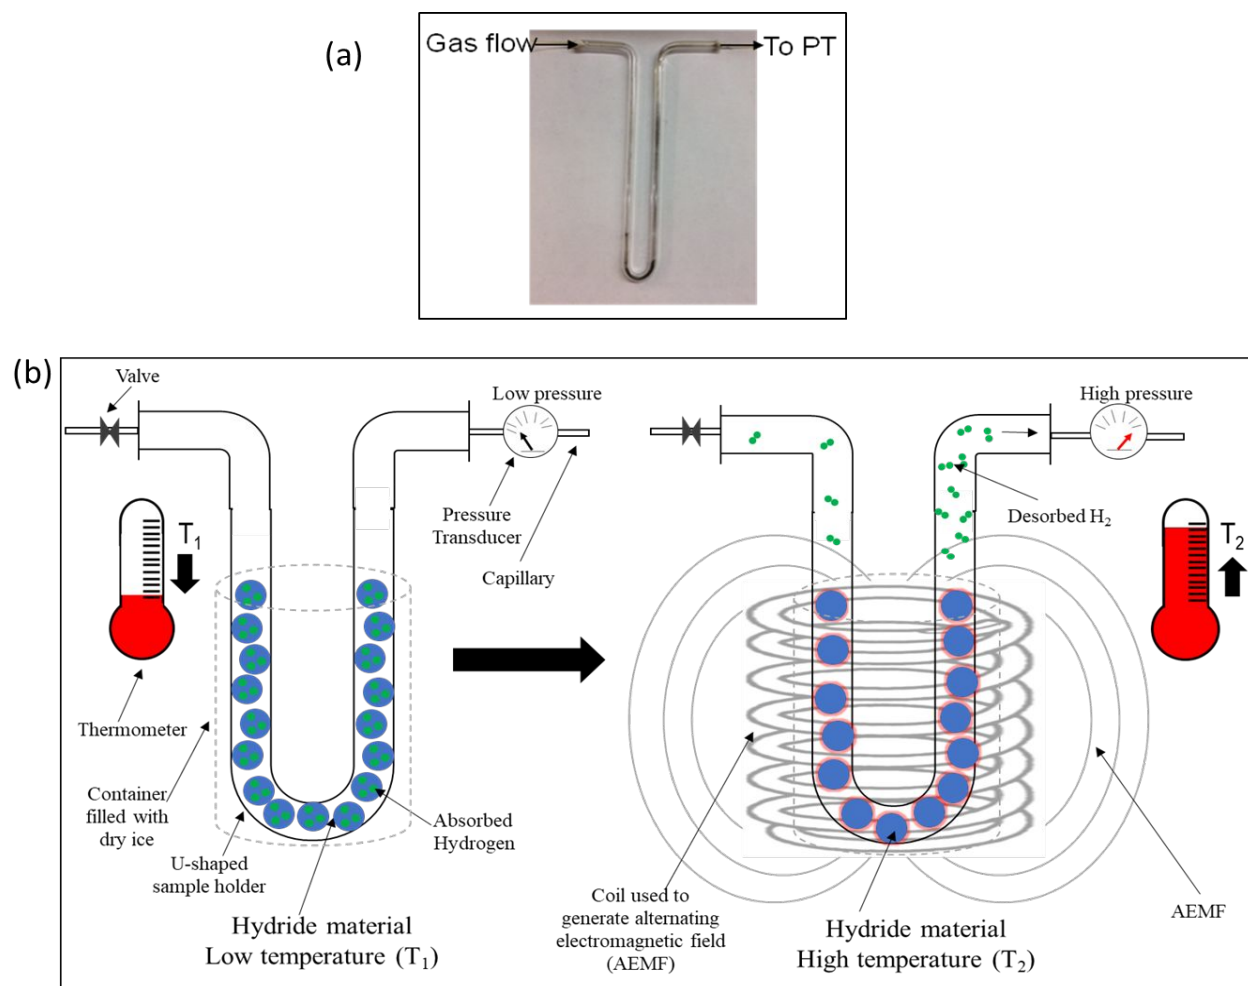

Figure 1 - SI. (a) Photograph of LANA in a U-shaped quartz sample holder showing gas flow; (b) Illustration of the efficient thermal process using alternating electromagnetic field for methodical and selective release of hydrogen isotopes.

A control study was completed with helium gas and compared with hydrogen gas, to evaluate material's hydriding properties. Specifically, the effect of gas composition, specifically pure helium (He), pure deuterium ( $D_2$ ), and 50/50 gas mixtures of  $D_2$ /He, on the pressure increase in an AEMF was investigated. As shown in Figure 2 - SI, minimal pressure increases were recorded in the presence of pure He and 50/50 gas mixtures of  $D_2$ /He, namely  $\approx 1$  Torr and 10 Torr, respectively. When pure  $D_2$  was tested the pressure increased to 500 Torr within 2 minutes. These results

indicate that, the decrease in pressure from D<sub>2</sub> to D<sub>2</sub>/He mixtures and pure He is due to the presence of a gas that is not absorbed by the material (He). This agrees with the well-known “helium blanketing effect”, where helium can accumulate and prevent the LANA from absorbing hydrogen.

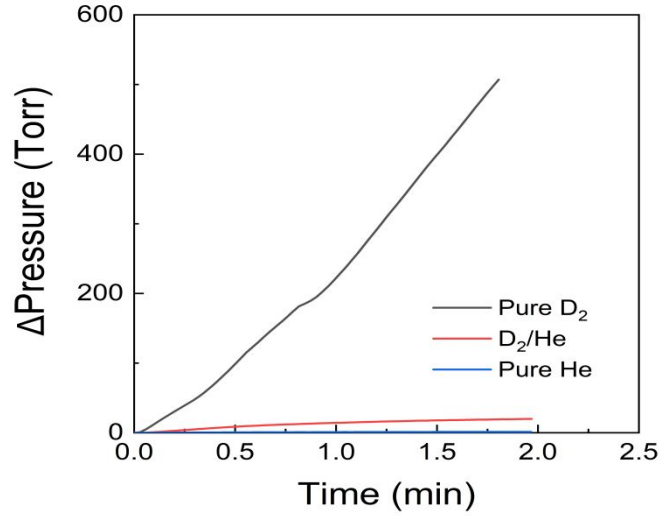

Figure 2 - SI. Effect of He in gas mixture on pressure increase for the m-LANA sample in a magnetic field (Power=80%, 27.3 G).

#### *Pressure Composition Isotherm Calculations*

The pressure composition isotherms were calculated using the ideal gas law and volumes that were measured using a helium volume calibration. The concentration of hydrogen was calculated:

$$[H_2]_{\text{aliquot}} = \frac{(P_{\text{loaded}} * V_{\text{cal}}) / P_{\text{after}}}{RT}$$

Where  $P_{\text{loaded}}$  is the pressure of the calibrated volume before and after loading the hydrogen onto the LANA. This was measured using a pressure transducer before and after the valve was opened to the LANA material. The  $P_{\text{after}}$  was measured after the valve was closed and the pressure equilibrated after pressure and temperature fluctuations from the valve mechanism.  $R$  is the gas constant and  $T$  is the temperature, which was the temperature measured of the room. The concentration of hydrogen was then converted to moles of hydrogen and normalized to the moles of metal atoms in LANA.

**Table 1.** The rate of pressure increase vs. AEMF strength (6,23).

| Power (%) | Current (Amps) | B (Tesla)             | B (Gaussian) |
|-----------|----------------|-----------------------|--------------|
| 50        | 6.4            | $1.07 \times 10^{-3}$ | 10.7         |
| 60        | 9.9            | $1.66 \times 10^{-3}$ | 16.6         |
| 70        | 13.3           | $2.23 \times 10^{-3}$ | 22.3         |
| 80        | 16.3           | $2.73 \times 10^{-3}$ | 27.3         |

**Table 2.** A compilation of ICP-MS results for LANA materials. The theoretical composition stoichiometry of  $\text{LaNi}_{4.25}\text{Al}_{0.75}$  (LANA) is as follows: mol % - La=16.7%, Ni=70.8%, Al=12.5%.

| Sample | Mol % La | Mol % Ni | Mol % Al |
|--------|----------|----------|----------|
| m-LANA | 12.8     | 56.3     | 30.9     |
| n-LANA | 11.6     | 52.6     | 35.8     |

**Table 3.** Rate of pressure increase due to differences in the electromagnetic field strengths.

| Power (%) | B (Gaussian) | Rate (Torr/min) of desorption<br>for m-LANA- $\text{H}_2$ |
|-----------|--------------|-----------------------------------------------------------|
| 50        | 10.7         | 2.6                                                       |
| 60        | 16.6         | 12.8                                                      |
| 70        | 22.3         | 108.5                                                     |
| 80        | 27.3         | 290.0                                                     |

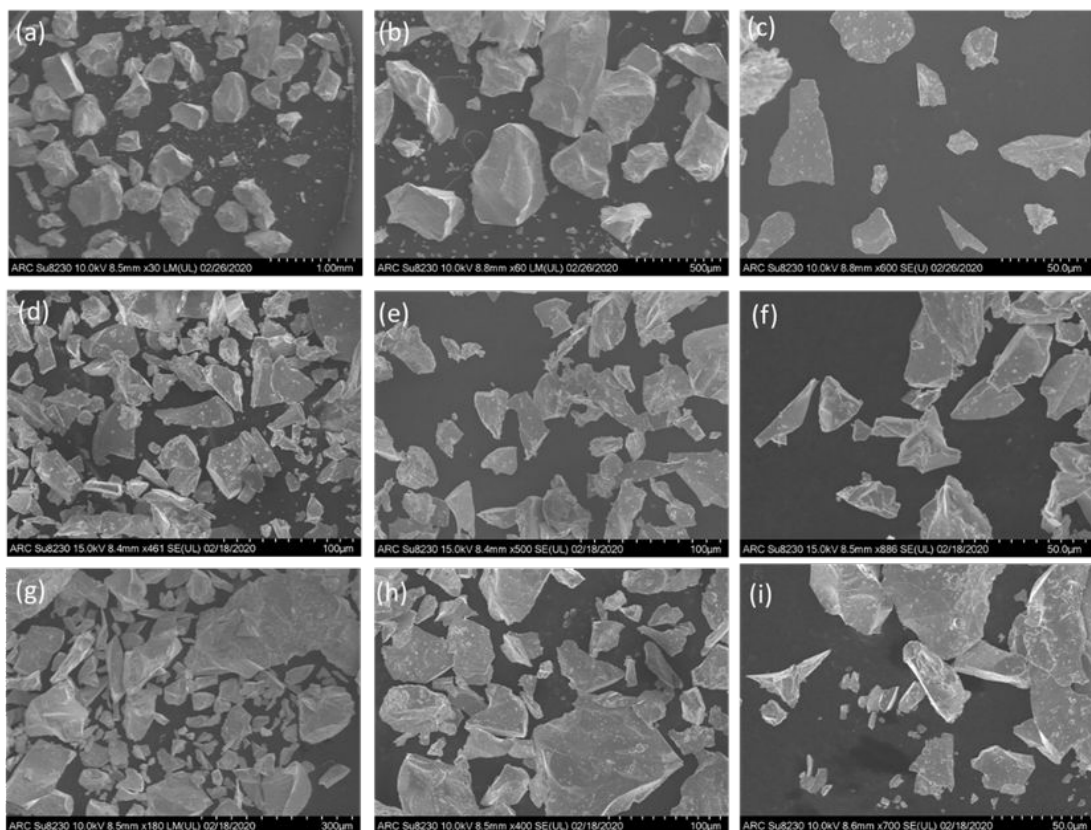

Figure 3-SI. SEM images of (a, b, c) a-LANA, (d, e, f) m-LANA and (g, h, i) n-LANA.
